# Supplementary material
Source: PubMed Central journal article supplement (PMC7615361)
Supplement: EMS191838-supplement-Supplementary_Figure_1_and_Supplementary_Information.pdf [file EMS191838-supplement-Supplementary_Figure_1_and_Supplementary_Information.pdf]

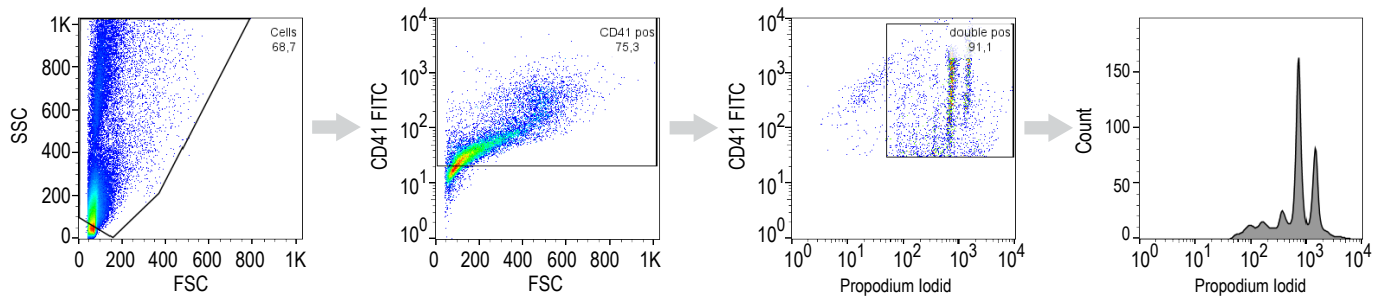

### Supplementary Figure 1. Gating strategy MK ploidy

Schematic representation to illustrate the method used to obtain MK ploidy data. FACS plots show the CD41/PI gating strategy. The detectors, dyes and fluorophores are indicated in the X and Y-axes.

## Supplementary Table 1. Minimal reporting checklist for targeted lipidomics

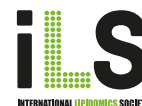

### General Lipidomics Workflow

#### Overall study design

|                                         |                                                                                                      |          |    |
|-----------------------------------------|------------------------------------------------------------------------------------------------------|----------|----|
| Title of the study                      | Critical shifts in lipid metabolism modulate megakaryocyte differentiation and proplatelet formation |          |    |
| Principle investigator                  | Robert Ahrends                                                                                       |          |    |
| Institution                             | University of Vienna, Faculty of Chemistry, Institute of Analytical Chemistry                        |          |    |
| Corresponding Email                     | robert.ahrends@univie.ac.at                                                                          |          |    |
| Document creation date                  | 11/29/2022                                                                                           | Clinical | No |
| Is the workflow targeted or untargeted? | Targeted                                                                                             |          |    |

#### Lipid extraction

|                   |                |                                                 |      |
|-------------------|----------------|-------------------------------------------------|------|
| Extraction method | 2-phase system | 2-phase system                                  | MTBE |
| pH adjustment     | None           | Were internal standards added prior extraction? | Yes  |

#### Analytical platform

|                                                                        |               |                                                                        |                |
|------------------------------------------------------------------------|---------------|------------------------------------------------------------------------|----------------|
| Number of separation dimensions                                        | One dimension | MS type                                                                | QTrap          |
| Separation Type 1                                                      | LC            | MS vendor                                                              | SCIEX          |
| Separation Mode 1                                                      | RP            | Ion source                                                             | ESI            |
| Separation window (1) for lipid analyte selection ( $\pm$ ) in minutes | 2             | MS Level                                                               | MS2            |
| RT verified by standard                                                | Yes           | Mass window for precursor ion isolation (in Da total isolation window) | unit           |
| CCS verified by standard                                               | No            | Mass resolution for detected ion at MS2                                | Low resolution |
| Separation of isobaric/isomeric interference confirmed                 | Yes           | Resolution in Da at MS2                                                | unit           |
| Model for separation prediction                                        | Yes           |                                                                        |                |

#### Quality control

|                |                                   |                 |    |
|----------------|-----------------------------------|-----------------|----|
| Blanks         | Yes                               | Quality control | No |
| Type of Blanks | Injection blank, Extraction blank |                 |    |

#### Method qualification and validation

|                                                      |     |                     |      |
|------------------------------------------------------|-----|---------------------|------|
| Method validation                                    | Yes | Precision           | No   |
| Lipid recovery                                       | Yes | Accuracy            | No   |
| Dynamic quantification range                         | Yes | Guidelines followed | None |
| Limit of quantitation (LOQ)/Limit of detection (LOD) | Yes |                     |      |

## Reporting

|                                                 |     |                 |                                        |
|-------------------------------------------------|-----|-----------------|----------------------------------------|
| Are reported raw data uploaded into repository? | Yes | Summary data    | Quantification and identification data |
| Are metadata available?                         | No  | Raw data upload | Yes                                    |

## Sample Descriptions

### megakaryocyte differentiation / Mouse / Cells

|                                      |                      |                                      |        |
|--------------------------------------|----------------------|--------------------------------------|--------|
| Provided information                 | Time to freeze (min) | Storage temperature                  | -80 °C |
| Temperature handling original sample | Room temperature     | Additives                            | None   |
| Instant sample preparation           | No                   | Were samples stored under inert gas? | No     |
| Time to freeze (min)                 | 0                    | Additional preservation methods      | No     |
| Snap freezing in liquid N2           | Yes                  | Biobank samples                      | No     |

## Lipid Class Descriptions

### Lipid class Cer[M+H]<sup>+</sup> / Lipid identification

|                                  |                         |                                        |              |
|----------------------------------|-------------------------|----------------------------------------|--------------|
| Lipid class                      | Cer                     | Isotope correction at MS2              | No           |
| MS Level                         | MS2                     | MS2 verified by standard               | Yes          |
| Identification level             | Molecular species level | Background check at MS2                | Yes          |
| Polarity mode                    | Positive                | Check isomer overlap                   | Yes          |
| Type of positive (precursor) ion | [M+H] <sup>+</sup>      | Lipid Identification Software          | LipidCreator |
| How many fragments used for ID   | 2 fragments             | Nomenclature for intact lipid molecule | Yes          |
| Fragment ion 1                   | LCB (-H3O2)             | Nomenclature for fragment ions         | N/A          |
| Fragment ion 2                   | - H2O m/z 18            |                                        |              |

### Lipid class Cer[M+H]<sup>+</sup> / For additional quantification methods

|                            |                          |                               |           |
|----------------------------|--------------------------|-------------------------------|-----------|
| Quantitative               | Yes                      | Limit of quantification       | S/N ratio |
| Internal lipid standard(s) | Cer 18:1;2/12:0          | Normalization to reference    | No        |
| Type of quantification     | Internal standard amount | Lipid Quantification Software | Skyline   |
| Response correction        | No                       | Batch correction              | No        |
| Type I isotope correction  | No                       |                               |           |

## Lipid class Hex2Cer[M+H]<sup>+</sup> / Lipid identification

|                                 |                         |                                        |              |
|---------------------------------|-------------------------|----------------------------------------|--------------|
| Lipid class                     | Hex2Cer                 | Isotope correction at MS2              | No           |
| MS Level                        | MS2                     | MS2 verified by standard               | No           |
| Identification level            | Molecular species level | Background check at MS2                | Yes          |
| Polarity mode                   | Positive                | Check isomer overlap                   | Yes          |
| Type of positive (precursor)ion | [M+H] <sup>+</sup>      | Lipid Identification Software          | LipidCreator |
| How many fragments used for ID  | 2 fragments             | Nomenclature for intact lipid molecule | Yes          |
| Fragment ion 1                  | LCB (-H3O2)             | Nomenclature for fragment ions         | N/A          |
| Fragment ion 2                  | -Hex2 m/z 342           |                                        |              |

## Lipid class Hex2Cer[M+H]<sup>+</sup> / For additional quantification methods

|                            |                          |                               |           |
|----------------------------|--------------------------|-------------------------------|-----------|
| Quantitative               | Yes                      | Limit of quantification       | S/N ratio |
| Internal lipid standard(s) | Hex2Cer 18:1;2/12:0      | Normalization to reference    | No        |
| Type of quantification     | Internal standard amount | Lipid Quantification Software | Skyline   |
| Response correction        | No                       | Batch correction              | No        |
| Type I isotope correction  | No                       |                               |           |

## Lipid class HexCer[M+H]<sup>+</sup> / Lipid identification

|                                 |                         |                                        |              |
|---------------------------------|-------------------------|----------------------------------------|--------------|
| Lipid class                     | HexCer                  | Isotope correction at MS2              | No           |
| MS Level                        | MS2                     | MS2 verified by standard               | Yes          |
| Identification level            | Molecular species level | Background check at MS2                | Yes          |
| Polarity mode                   | Positive                | Check isomer overlap                   | Yes          |
| Type of positive (precursor)ion | [M+H] <sup>+</sup>      | Lipid Identification Software          | LipidCreator |
| How many fragments used for ID  | 2 fragments             | Nomenclature for intact lipid molecule | Yes          |
| Fragment ion 1                  | LCB (-H3O2)             | Nomenclature for fragment ions         | N/A          |
| Fragment ion 2                  | -Hex m/z 180            |                                        |              |

## Lipid class HexCer[M+H]<sup>+</sup> / For additional quantification methods

|                            |                          |                               |           |
|----------------------------|--------------------------|-------------------------------|-----------|
| Quantitative               | Yes                      | Limit of quantification       | S/N ratio |
| Internal lipid standard(s) | HexCer 18:1;2/12:0       | Normalization to reference    | No        |
| Type of quantification     | Internal standard amount | Lipid Quantification Software | Skyline   |
| Response correction        | No                       | Batch correction              | No        |
| Type I isotope correction  | No                       |                               |           |

## Lipid class SHexCer[M+H]<sup>+</sup> / Lipid identification

|                                 |                         |                                        |              |
|---------------------------------|-------------------------|----------------------------------------|--------------|
| Lipid class                     | SHexCer                 | Isotope correction at MS2              | No           |
| MS Level                        | MS2                     | MS2 verified by standard               | Yes          |
| Identification level            | Molecular species level | Background check at MS2                | Yes          |
| Polarity mode                   | Positive                | Check isomer overlap                   | Yes          |
| Type of positive (precursor)ion | [M+H] <sup>+</sup>      | Lipid Identification Software          | LipidCreator |
| How many fragments used for ID  | 2 fragments             | Nomenclature for intact lipid molecule | Yes          |
| Fragment ion 1                  | LCB (-H3O2)             | Nomenclature for fragment ions         | N/A          |
| Fragment ion 2                  | - SHex m/z 260          |                                        |              |

## Lipid class SHexCer[M+H]<sup>+</sup> / For additional quantification methods

|                            |                          |                               |           |
|----------------------------|--------------------------|-------------------------------|-----------|
| Quantitative               | Yes                      | Limit of quantification       | S/N ratio |
| Internal lipid standard(s) | HexCer 18:1;2/12:0       | Normalization to reference    | No        |
| Type of quantification     | Internal standard amount | Lipid Quantification Software | Skyline   |
| Response correction        | No                       | Batch correction              | No        |
| Type I isotope correction  | No                       |                               |           |

## Lipid class LSM[M+H]<sup>+</sup> / Lipid identification

|                                 |                         |                                        |              |
|---------------------------------|-------------------------|----------------------------------------|--------------|
| Lipid class                     | LSM                     | Isotope correction at MS2              | No           |
| MS Level                        | MS2                     | MS2 verified by standard               | Yes          |
| Identification level            | Molecular species level | Background check at MS2                | Yes          |
| Polarity mode                   | Positive                | Check isomer overlap                   | Yes          |
| Type of positive (precursor)ion | [M+H] <sup>+</sup>      | Lipid Identification Software          | LipidCreator |
| How many fragments used for ID  | 2 fragments             | Nomenclature for intact lipid molecule | Yes          |
| Fragment ion 1                  | LCB (-H3O2)             | Nomenclature for fragment ions         | N/A          |
| Fragment ion 2                  | PC m/z 184              |                                        |              |

## Lipid class LSM[M+H]<sup>+</sup> / For additional quantification methods

|                            |                          |                               |           |
|----------------------------|--------------------------|-------------------------------|-----------|
| Quantitative               | Yes                      | Limit of quantification       | S/N ratio |
| Internal lipid standard(s) | LSM 18:1;2               | Normalization to reference    | No        |
| Type of quantification     | Internal standard amount | Lipid Quantification Software | Skyline   |
| Response correction        | No                       | Batch correction              | No        |
| Type I isotope correction  | No                       |                               |           |

## Lipid class SPBP[M+H]<sup>+</sup> / Lipid identification

|                                 |                         |                                        |              |
|---------------------------------|-------------------------|----------------------------------------|--------------|
| Lipid class                     | SPBP                    | Isotope correction at MS2              | No           |
| MS Level                        | MS2                     | MS2 verified by standard               | Yes          |
| Identification level            | Molecular species level | Background check at MS2                | Yes          |
| Polarity mode                   | Positive                | Check isomer overlap                   | Yes          |
| Type of positive (precursor)ion | [M+H] <sup>+</sup>      | Lipid Identification Software          | LipidCreator |
| How many fragments used for ID  | 2 fragments             | Nomenclature for intact lipid molecule | Yes          |
| Fragment ion 1                  | LCB (-H3O2)             | Nomenclature for fragment ions         | N/A          |
| Fragment ion 2                  | - H3PO4 m/z 98          |                                        |              |

## Lipid class SPBP[M+H]<sup>+</sup> / For additional quantification methods

|                            |                          |                               |           |
|----------------------------|--------------------------|-------------------------------|-----------|
| Quantitative               | Yes                      | Limit of quantification       | S/N ratio |
| Internal lipid standard(s) | SPBP 17:1                | Normalization to reference    | No        |
| Type of quantification     | Internal standard amount | Lipid Quantification Software | Skyline   |
| Response correction        | No                       | Batch correction              | No        |
| Type I isotope correction  | No                       |                               |           |

## Lipid class SPB[M+H]<sup>+</sup> / Lipid identification

|                                 |                         |                                        |              |
|---------------------------------|-------------------------|----------------------------------------|--------------|
| Lipid class                     | SPB                     | Isotope correction at MS2              | No           |
| MS Level                        | MS2                     | MS2 verified by standard               | Yes          |
| Identification level            | Molecular species level | Background check at MS2                | Yes          |
| Polarity mode                   | Positive                | Check isomer overlap                   | Yes          |
| Type of positive (precursor)ion | [M+H] <sup>+</sup>      | Lipid Identification Software          | LipidCreator |
| How many fragments used for ID  | 2 fragments             | Nomenclature for intact lipid molecule | Yes          |
| Fragment ion 1                  | LCB (-H3O2)             | Nomenclature for fragment ions         | N/A          |
| Fragment ion 2                  | LCB (-CH3O2)            |                                        |              |

## Lipid class SPB[M+H]<sup>+</sup> / For additional quantification methods

|                            |                          |                               |           |
|----------------------------|--------------------------|-------------------------------|-----------|
| Quantitative               | Yes                      | Limit of quantification       | S/N ratio |
| Internal lipid standard(s) | SPB 17:0                 | Normalization to reference    | No        |
| Type of quantification     | Internal standard amount | Lipid Quantification Software | Skyline   |
| Response correction        | No                       | Batch correction              | No        |
| Type I isotope correction  | No                       |                               |           |

## Lipid class SPB[M+H]<sup>+</sup> / Lipid identification

|                                 |                         |                                        |              |
|---------------------------------|-------------------------|----------------------------------------|--------------|
| Lipid class                     | SPB                     | Isotope correction at MS2              | No           |
| MS Level                        | MS2                     | MS2 verified by standard               | Yes          |
| Identification level            | Molecular species level | Background check at MS2                | Yes          |
| Polarity mode                   | Positive                | Check isomer overlap                   | Yes          |
| Type of positive (precursor)ion | [M+H] <sup>+</sup>      | Lipid Identification Software          | LipidCreator |
| How many fragments used for ID  | 2 fragments             | Nomenclature for intact lipid molecule | Yes          |
| Fragment ion 1                  | LCB (-H3O2)             | Nomenclature for fragment ions         | N/A          |
| Fragment ion 2                  | LCB (-CH3O2)            |                                        |              |

## Lipid class SPB[M+H]<sup>+</sup> / For additional quantification methods

|                            |                          |                               |           |
|----------------------------|--------------------------|-------------------------------|-----------|
| Quantitative               | Yes                      | Limit of quantification       | S/N ratio |
| Internal lipid standard(s) | SPB 17:1                 | Normalization to reference    | No        |
| Type of quantification     | Internal standard amount | Lipid Quantification Software | Skyline   |
| Response correction        | No                       | Batch correction              | No        |
| Type I isotope correction  | No                       |                               |           |

## Lipid class SE[M+NH4]<sup>+</sup> / Lipid identification

|                                 |                          |                                        |              |
|---------------------------------|--------------------------|----------------------------------------|--------------|
| Lipid class                     | SE                       | Isotope correction at MS2              | No           |
| MS Level                        | MS2                      | MS2 verified by standard               | Yes          |
| Identification level            | Molecular species level  | Background check at MS2                | Yes          |
| Polarity mode                   | Positive                 | Check isomer overlap                   | Yes          |
| Type of positive (precursor)ion | [M+NH4] <sup>+</sup>     | Lipid Identification Software          | LipidCreator |
| How many fragments used for ID  | 1 fragment               | Nomenclature for intact lipid molecule | Yes          |
| Fragment ion 1                  | - FA(+HO) - ST<br>m/z 35 | Nomenclature for fragment ions         | N/A          |

## Lipid class SE[M+NH4]<sup>+</sup> / For additional quantification methods

|                            |                          |                               |           |
|----------------------------|--------------------------|-------------------------------|-----------|
| Quantitative               | Yes                      | Limit of quantification       | S/N ratio |
| Internal lipid standard(s) | SE 27:1;1/18:1(d7)       | Normalization to reference    | No        |
| Type of quantification     | Internal standard amount | Lipid Quantification Software | Skyline   |
| Response correction        | No                       | Batch correction              | No        |
| Type I isotope correction  | No                       |                               |           |

## Lipid class ST[M+NH4]<sup>+</sup> / Lipid identification

|                                 |                         |                                        |              |
|---------------------------------|-------------------------|----------------------------------------|--------------|
| Lipid class                     | ST                      | Isotope correction at MS2              | No           |
| MS Level                        | MS2                     | MS2 verified by standard               | Yes          |
| Identification level            | Molecular species level | Background check at MS2                | Yes          |
| Polarity mode                   | Positive                | Check isomer overlap                   | Yes          |
| Type of positive (precursor)ion | [M+NH4] <sup>+</sup>    | Lipid Identification Software          | LipidCreator |
| How many fragments used for ID  | 1 fragment              | Nomenclature for intact lipid molecule | Yes          |
| Fragment ion 1                  | - ST m/z 35             | Nomenclature for fragment ions         | N/A          |

## Lipid class ST[M+NH4]<sup>+</sup> / For additional quantification methods

|                            |                          |                               |           |
|----------------------------|--------------------------|-------------------------------|-----------|
| Quantitative               | Yes                      | Limit of quantification       | S/N ratio |
| Internal lipid standard(s) | ST 27:1;1(d7)            | Normalization to reference    | No        |
| Type of quantification     | Internal standard amount | Lipid Quantification Software | Skyline   |
| Response correction        | No                       | Batch correction              | No        |
| Type I isotope correction  | No                       |                               |           |

## Lipid class SM[M+H]<sup>+</sup> / Lipid identification

|                                 |                         |                                        |              |
|---------------------------------|-------------------------|----------------------------------------|--------------|
| Lipid class                     | SM                      | Isotope correction at MS2              | No           |
| MS Level                        | MS2                     | MS2 verified by standard               | Yes          |
| Identification level            | Molecular species level | Background check at MS2                | Yes          |
| Polarity mode                   | Positive                | Check isomer overlap                   | Yes          |
| Type of positive (precursor)ion | [M+H] <sup>+</sup>      | Lipid Identification Software          | LipidCreator |
| How many fragments used for ID  | 2 fragments             | Nomenclature for intact lipid molecule | Yes          |
| Fragment ion 1                  | LCB (-H3O2)             | Nomenclature for fragment ions         | N/A          |
| Fragment ion 2                  | PC m/z 184              |                                        |              |

## Lipid class SM[M+H]<sup>+</sup> / For additional quantification methods

|                            |                          |                               |           |
|----------------------------|--------------------------|-------------------------------|-----------|
| Quantitative               | Yes                      | Limit of quantification       | S/N ratio |
| Internal lipid standard(s) | SM 18:1;2/18:1(d9)       | Normalization to reference    | No        |
| Type of quantification     | Internal standard amount | Lipid Quantification Software | Skyline   |
| Response correction        | No                       | Batch correction              | No        |
| Type I isotope correction  | No                       |                               |           |



## Supplementary Table 2. Minimal reporting checklist for untargeted lipidomics

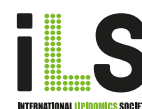

### General Lipidomics Workflow

#### Overall study design

|                                         |                                                                                                      |          |    |
|-----------------------------------------|------------------------------------------------------------------------------------------------------|----------|----|
| Title of the study                      | Critical shifts in lipid metabolism modulate megakaryocyte differentiation and proplatelet formation |          |    |
| Principle investigator                  | Robert Ahrends                                                                                       |          |    |
| Institution                             | University of Vienna, Faculty of Chemistry, Institute of Analytical Chemistry                        |          |    |
| Corresponding Email                     | robert.ahrends@univie.ac.at                                                                          |          |    |
| Document creation date                  | 11/24/2022                                                                                           | Clinical | No |
| Is the workflow targeted or untargeted? | Untargeted                                                                                           |          |    |

#### Lipid extraction

|                   |                |                                                 |      |
|-------------------|----------------|-------------------------------------------------|------|
| Extraction method | 2-phase system | 2-phase system                                  | MTBE |
| pH adjustment     | None           | Were internal standards added prior extraction? | Yes  |

#### Analytical platform

|                                         |                 |                                                                        |                 |
|-----------------------------------------|-----------------|------------------------------------------------------------------------|-----------------|
| MS type                                 | Orbitrap        | Resolution at m/z 200 at MS1                                           | 240000          |
| MS vendor                               | Thermo          | Mass accuracy in ppm at MS1                                            | 5               |
| Ion source                              | nESI            | Mass window for precursor ion isolation (in Da total isolation window) | 1               |
| Direct type                             | Chip            | Mass resolution for detected ion at MS2                                | High resolution |
| MS Level                                | MS1, MS2        | Resolution at m/z 200 at MS2                                           | 60000           |
| Mass resolution for detected ion at MS1 | High resolution | Mass accuracy in ppm at MS2                                            | 10              |

#### Quality control

|                |                  |                 |    |
|----------------|------------------|-----------------|----|
| Blanks         | Yes              | Quality control | No |
| Type of Blanks | Extraction blank |                 |    |

#### Method qualification and validation

|                                                      |     |                     |      |
|------------------------------------------------------|-----|---------------------|------|
| Method validation                                    | Yes | Precision           | Yes  |
| Lipid recovery                                       | Yes | Accuracy            | Yes  |
| Dynamic quantification range                         | Yes | Guidelines followed | None |
| Limit of quantitation (LOQ)/Limit of detection (LOD) | Yes |                     |      |

#### Reporting

|                                                 |     |                 |                                        |
|-------------------------------------------------|-----|-----------------|----------------------------------------|
| Are reported raw data uploaded into repository? | Yes | Summary data    | Quantification and identification data |
| Are metadata available?                         | Yes | Raw data upload | Yes                                    |

## Sample Descriptions

### megakaryocyte differentiation + PL biosynthesis inhibitors / Mouse / Cells

|                                      |                      |                                      |        |
|--------------------------------------|----------------------|--------------------------------------|--------|
| Provided information                 | Time to freeze (min) | Storage temperature                  | -80 °C |
| Temperature handling original sample | Room temperature     | Additives                            | None   |
| Instant sample preparation           | No                   | Were samples stored under inert gas? | No     |
| Time to freeze (min)                 | 0                    | Additional preservation methods      | No     |
| Snap freezing in liquid N2           | Yes                  | Biobank samples                      | No     |

### megakaryocyte differentiation / Mouse / Cells

|                                      |                      |                                      |        |
|--------------------------------------|----------------------|--------------------------------------|--------|
| Provided information                 | Time to freeze (min) | Storage temperature                  | -80 °C |
| Temperature handling original sample | Room temperature     | Additives                            | None   |
| Instant sample preparation           | No                   | Were samples stored under inert gas? | No     |
| Time to freeze (min)                 | 0                    | Additional preservation methods      | No     |
| Snap freezing in liquid N2           | Yes                  | Biobank samples                      | No     |

## Lipid Class Descriptions

### Lipid class CL[M-H]- / Lipid identification

|                                 |               |                                        |                                   |
|---------------------------------|---------------|----------------------------------------|-----------------------------------|
| Lipid class                     | CL            | MS1 verified by standard               | Yes                               |
| MS Level                        | MS1           | Background check at MS1                | Yes                               |
| Identification level            | Species level | Check isomer overlap                   | Yes                               |
| Polarity mode                   | Negative      | Lipid Identification Software          | LipidXplorer                      |
| Type of negative (precursor)ion | [M-H]-        | Data manipulation                      | Centroiding, Lock mass correction |
| Isotope correction at MS1       | Type 2        | Nomenclature for intact lipid molecule | Yes                               |

### Lipid class CL[M-H]- / For additional quantification methods

|                            |                          |                               |                  |
|----------------------------|--------------------------|-------------------------------|------------------|
| Quantitative               | Yes                      | Limit of quantification       | Signal threshold |
| Internal lipid standard(s) | PG 15:0-18:1 (d7)        | Normalization to reference    | No               |
| Type of quantification     | Internal standard amount | Lipid Quantification Software | LipidXplorer     |
| Response correction        | No                       | Batch correction              | No               |
| Type I isotope correction  | Yes                      |                               |                  |

## Lipid class DG[M+NH4]<sup>+</sup> / Lipid identification

|                                 |                         |                                        |                                   |
|---------------------------------|-------------------------|----------------------------------------|-----------------------------------|
| Lipid class                     | DG                      | MS1 verified by standard               | Yes                               |
| MS Level                        | MS1, MS2                | MS2 verified by standard               | Yes                               |
| Identification level            | Molecular species level | Background check at MS1                | Yes                               |
| Polarity mode                   | Positive                | Background check at MS2                | Yes                               |
| Type of positive (precursor)ion | [M+NH4] <sup>+</sup>    | Check isomer overlap                   | Yes                               |
| How many fragments used for ID  | 2 fragments             | Lipid Identification Software          | LipidXplorer                      |
| Fragment ion 1                  | -FA1 (-H) -DG m/z 35    | Data manipulation                      | Centroiding, Lock mass correction |
| Fragment ion 2                  | -FA2 (-H) -DG m/z 35    | Nomenclature for intact lipid molecule | Yes                               |
| Isotope correction at MS1       | Type 2                  | Nomenclature for fragment ions         | Yes                               |
| Isotope correction at MS2       | Type 2                  |                                        |                                   |

## Lipid class DG[M+NH4]<sup>+</sup> / For additional quantification methods

|                            |                          |                               |                  |
|----------------------------|--------------------------|-------------------------------|------------------|
| Quantitative               | Yes                      | Limit of quantification       | Signal threshold |
| Internal lipid standard(s) | DG 15:0-18:1 (d7)        | Normalization to reference    | No               |
| Type of quantification     | Internal standard amount | Lipid Quantification Software | LipidXplorer     |
| Response correction        | No                       | Batch correction              | No               |
| Type I isotope correction  | Yes                      |                               |                  |

## Lipid class LPA[M-H]<sup>-</sup> / Lipid identification

|                                 |                         |                                        |                                   |
|---------------------------------|-------------------------|----------------------------------------|-----------------------------------|
| Lipid class                     | LPA                     | MS1 verified by standard               | Yes                               |
| MS Level                        | MS1, MS2                | MS2 verified by standard               | Yes                               |
| Identification level            | Molecular species level | Background check at MS1                | Yes                               |
| Polarity mode                   | Negative                | Background check at MS2                | Yes                               |
| Type of negative (precursor)ion | [M-H] <sup>-</sup>      | Check isomer overlap                   | Yes                               |
| How many fragments used for ID  | 1 fragment              | Lipid Identification Software          | LipidXplorer                      |
| Fragment ion 1                  | FA1 (+O)                | Data manipulation                      | Centroiding, Lock mass correction |
| Isotope correction at MS1       | Type 2                  | Nomenclature for intact lipid molecule | Yes                               |
| Isotope correction at MS2       | Type 2                  | Nomenclature for fragment ions         | Yes                               |

## Lipid class LPA[M-H]<sup>-</sup> / For additional quantification methods

|                            |                          |                               |                  |
|----------------------------|--------------------------|-------------------------------|------------------|
| Quantitative               | Yes                      | Limit of quantification       | Signal threshold |
| Internal lipid standard(s) | LPE 18:1 (d7)            | Normalization to reference    | No               |
| Type of quantification     | Internal standard amount | Lipid Quantification Software | LipidXplorer     |
| Response correction        | No                       | Batch correction              | No               |
| Type I isotope correction  | Yes                      |                               |                  |

## Lipid class LPC[M+CH3COO]- / Lipid identification

|                                 |                         |                                        |                                   |
|---------------------------------|-------------------------|----------------------------------------|-----------------------------------|
| Lipid class                     | LPC                     | MS1 verified by standard               | Yes                               |
| MS Level                        | MS1, MS2                | MS2 verified by standard               | Yes                               |
| Identification level            | Molecular species level | Background check at MS1                | Yes                               |
| Polarity mode                   | Negative                | Background check at MS2                | Yes                               |
| Type of negative (precursor)ion | [M+CH3COO]-             | Check isomer overlap                   | Yes                               |
| How many fragments used for ID  | 2 fragments             | Lipid Identification Software          | LipidXplorer                      |
| Fragment ion 1                  | FA1 (+O)                | Data manipulation                      | Centroiding, Lock mass correction |
| Fragment ion 2                  | PC m/z 74               | Nomenclature for intact lipid molecule | Yes                               |
| Isotope correction at MS1       | Type 2                  | Nomenclature for fragment ions         | Yes                               |
| Isotope correction at MS2       | Type 2                  |                                        |                                   |

## Lipid class LPC[M+CH3COO]- / For additional quantification methods

|                            |                          |                               |                  |
|----------------------------|--------------------------|-------------------------------|------------------|
| Quantitative               | Yes                      | Limit of quantification       | Signal threshold |
| Internal lipid standard(s) | LPC 18:1 (d7)            | Normalization to reference    | No               |
| Type of quantification     | Internal standard amount | Lipid Quantification Software | LipidXplorer     |
| Response correction        | No                       | Batch correction              | No               |
| Type I isotope correction  | Yes                      |                               |                  |

## Lipid class LPE[M-H]- / Lipid identification

|                                 |                         |                                        |                                   |
|---------------------------------|-------------------------|----------------------------------------|-----------------------------------|
| Lipid class                     | LPE                     | MS1 verified by standard               | Yes                               |
| MS Level                        | MS1, MS2                | MS2 verified by standard               | Yes                               |
| Identification level            | Molecular species level | Background check at MS1                | Yes                               |
| Polarity mode                   | Negative                | Background check at MS2                | Yes                               |
| Type of negative (precursor)ion | [M-H]-                  | Check isomer overlap                   | Yes                               |
| How many fragments used for ID  | 1 fragment              | Lipid Identification Software          | LipidXplorer                      |
| Fragment ion 1                  | FA1 (+O)                | Data manipulation                      | Centroiding, Lock mass correction |
| Isotope correction at MS1       | Type 2                  | Nomenclature for intact lipid molecule | Yes                               |
| Isotope correction at MS2       | Type 2                  | Nomenclature for fragment ions         | Yes                               |

## Lipid class LPE[M-H]- / For additional quantification methods

|                            |                          |                               |                  |
|----------------------------|--------------------------|-------------------------------|------------------|
| Quantitative               | Yes                      | Limit of quantification       | Signal threshold |
| Internal lipid standard(s) | LPE 18:1 (d7)            | Normalization to reference    | No               |
| Type of quantification     | Internal standard amount | Lipid Quantification Software | LipidXplorer     |
| Response correction        | No                       | Batch correction              | No               |
| Type I isotope correction  | Yes                      |                               |                  |

## Lipid class LPG[M-H]- / Lipid identification

|                                 |                         |                                        |                                   |
|---------------------------------|-------------------------|----------------------------------------|-----------------------------------|
| Lipid class                     | LPG                     | MS1 verified by standard               | Yes                               |
| MS Level                        | MS1, MS2                | MS2 verified by standard               | Yes                               |
| Identification level            | Molecular species level | Background check at MS1                | Yes                               |
| Polarity mode                   | Negative                | Background check at MS2                | Yes                               |
| Type of negative (precursor)ion | [M-H]-                  | Check isomer overlap                   | Yes                               |
| How many fragments used for ID  | 1 fragment              | Lipid Identification Software          | LipidXplorer                      |
| Fragment ion 1                  | FA1 (+O)                | Data manipulation                      | Centroiding, Lock mass correction |
| Isotope correction at MS1       | Type 2                  | Nomenclature for intact lipid molecule | Yes                               |
| Isotope correction at MS2       | Type 2                  | Nomenclature for fragment ions         | Yes                               |

## Lipid class LPG[M-H]- / For additional quantification methods

|                            |                          |                               |                  |
|----------------------------|--------------------------|-------------------------------|------------------|
| Quantitative               | Yes                      | Limit of quantification       | Signal threshold |
| Internal lipid standard(s) | LPE 18:1 (d7)            | Normalization to reference    | No               |
| Type of quantification     | Internal standard amount | Lipid Quantification Software | LipidXplorer     |
| Response correction        | No                       | Batch correction              | No               |
| Type I isotope correction  | Yes                      |                               |                  |

## Lipid class LPI[M-H]- / Lipid identification

|                                 |                         |                                        |                                   |
|---------------------------------|-------------------------|----------------------------------------|-----------------------------------|
| Lipid class                     | LPI                     | MS1 verified by standard               | Yes                               |
| MS Level                        | MS1, MS2                | MS2 verified by standard               | Yes                               |
| Identification level            | Molecular species level | Background check at MS1                | Yes                               |
| Polarity mode                   | Negative                | Background check at MS2                | Yes                               |
| Type of negative (precursor)ion | [M-H]-                  | Check isomer overlap                   | Yes                               |
| How many fragments used for ID  | 2 fragments             | Lipid Identification Software          | LipidXplorer                      |
| Fragment ion 1                  | FA1 (+O)                | Data manipulation                      | Centroiding, Lock mass correction |
| Fragment ion 2                  | PI m/z 241              | Nomenclature for intact lipid molecule | Yes                               |
| Isotope correction at MS1       | Type 2                  | Nomenclature for fragment ions         | Yes                               |
| Isotope correction at MS2       | Type 2                  |                                        |                                   |

## Lipid class LPI[M-H]- / For additional quantification methods

|                            |                          |                               |                  |
|----------------------------|--------------------------|-------------------------------|------------------|
| Quantitative               | Yes                      | Limit of quantification       | Signal threshold |
| Internal lipid standard(s) | LPE 18:1 (d7)            | Normalization to reference    | No               |
| Type of quantification     | Internal standard amount | Lipid Quantification Software | LipidXplorer     |
| Response correction        | No                       | Batch correction              | No               |
| Type I isotope correction  | Yes                      |                               |                  |

## Lipid class LPS[M-H]- / Lipid identification

|                                 |                         |                                        |                                   |
|---------------------------------|-------------------------|----------------------------------------|-----------------------------------|
| Lipid class                     | LPS                     | MS1 verified by standard               | Yes                               |
| MS Level                        | MS1, MS2                | MS2 verified by standard               | Yes                               |
| Identification level            | Molecular species level | Background check at MS1                | Yes                               |
| Polarity mode                   | Negative                | Background check at MS2                | Yes                               |
| Type of negative (precursor)ion | [M-H]-                  | Check isomer overlap                   | Yes                               |
| How many fragments used for ID  | 2 fragments             | Lipid Identification Software          | LipidXplorer                      |
| Fragment ion 1                  | FA1 (+O)                | Data manipulation                      | Centroiding, Lock mass correction |
| Fragment ion 2                  | PS m/z 87               | Nomenclature for intact lipid molecule | Yes                               |
| Isotope correction at MS1       | Type 2                  | Nomenclature for fragment ions         | Yes                               |
| Isotope correction at MS2       | Type 2                  |                                        |                                   |

## Lipid class LPS[M-H]- / For additional quantification methods

|                            |                          |                               |                  |
|----------------------------|--------------------------|-------------------------------|------------------|
| Quantitative               | Yes                      | Limit of quantification       | Signal threshold |
| Internal lipid standard(s) | LPE 18:1 (d7)            | Normalization to reference    | No               |
| Type of quantification     | Internal standard amount | Lipid Quantification Software | LipidXplorer     |
| Response correction        | No                       | Batch correction              | No               |
| Type I isotope correction  | Yes                      |                               |                  |

## Lipid class PA[M-H]- / Lipid identification

|                                 |                         |                                        |                                   |
|---------------------------------|-------------------------|----------------------------------------|-----------------------------------|
| Lipid class                     | PA                      | MS1 verified by standard               | Yes                               |
| MS Level                        | MS1, MS2                | MS2 verified by standard               | Yes                               |
| Identification level            | Molecular species level | Background check at MS1                | Yes                               |
| Polarity mode                   | Negative                | Background check at MS2                | Yes                               |
| Type of negative (precursor)ion | [M-H]-                  | Check isomer overlap                   | Yes                               |
| How many fragments used for ID  | 2 fragments             | Lipid Identification Software          | LipidXplorer                      |
| Fragment ion 1                  | FA1 (+O)                | Data manipulation                      | Centroiding, Lock mass correction |
| Fragment ion 2                  | FA2 (+O)                | Nomenclature for intact lipid molecule | Yes                               |
| Isotope correction at MS1       | Type 2                  | Nomenclature for fragment ions         | Yes                               |
| Isotope correction at MS2       | Type 2                  |                                        |                                   |

## Lipid class PA[M-H]- / For additional quantification methods

|                            |                          |                               |                  |
|----------------------------|--------------------------|-------------------------------|------------------|
| Quantitative               | Yes                      | Limit of quantification       | Signal threshold |
| Internal lipid standard(s) | PA 15:0-18:1 (d7)        | Normalization to reference    | No               |
| Type of quantification     | Internal standard amount | Lipid Quantification Software | LipidXplorer     |
| Response correction        | No                       | Batch correction              | No               |
| Type I isotope correction  | Yes                      |                               |                  |

## Lipid class PC O-a[M+CH3COO]- / Lipid identification

|                                 |                         |                                        |                                   |
|---------------------------------|-------------------------|----------------------------------------|-----------------------------------|
| Lipid class                     | PC O-a                  | Isotope correction at MS2              | Type 2                            |
| MS Level                        | MS1, MS2                | MS1 verified by standard               | Yes                               |
| Identification level            | Molecular species level | MS2 verified by standard               | Yes                               |
| Polarity mode                   | Negative                | Background check at MS1                | Yes                               |
| Type of negative (precursor)ion | [M+CH3COO]-             | Background check at MS2                | Yes                               |
| How many fragments used for ID  | 3 fragments             | Check isomer overlap                   | Yes                               |
| Fragment ion 1                  | - FA2 (-H)              | Lipid Identification Software          | LipidXplorer                      |
| Fragment ion 2                  | FA2 (+O)                | Data manipulation                      | Centroiding, Lock mass correction |
| Fragment ion 3                  | PC m/z 74               | Nomenclature for intact lipid molecule | Yes                               |
| Isotope correction at MS1       | Type 2                  | Nomenclature for fragment ions         | Yes                               |

## Lipid class PC O-a[M+CH3COO]- / For additional quantification methods

|                            |                          |                               |                  |
|----------------------------|--------------------------|-------------------------------|------------------|
| Quantitative               | Yes                      | Limit of quantification       | Signal threshold |
| Internal lipid standard(s) | PC O-p18:0/18:1 (d9)     | Normalization to reference    | No               |
| Type of quantification     | Internal standard amount | Lipid Quantification Software | LipidXplorer     |
| Response correction        | No                       | Batch correction              | No               |
| Type I isotope correction  | Yes                      |                               |                  |

## Lipid class PC[M+CH3COO]- / Lipid identification

|                                 |                         |                                        |                                   |
|---------------------------------|-------------------------|----------------------------------------|-----------------------------------|
| Lipid class                     | PC                      | Isotope correction at MS2              | Type 2                            |
| MS Level                        | MS1, MS2                | MS1 verified by standard               | Yes                               |
| Identification level            | Molecular species level | MS2 verified by standard               | Yes                               |
| Polarity mode                   | Negative                | Background check at MS1                | Yes                               |
| Type of negative (precursor)ion | [M+CH3COO]-             | Background check at MS2                | Yes                               |
| How many fragments used for ID  | 3 fragments             | Check isomer overlap                   | Yes                               |
| Fragment ion 1                  | FA1 (+O)                | Lipid Identification Software          | LipidXplorer                      |
| Fragment ion 2                  | FA2 (+O)                | Data manipulation                      | Centroiding, Lock mass correction |
| Fragment ion 3                  | PC m/z 74               | Nomenclature for intact lipid molecule | Yes                               |
| Isotope correction at MS1       | Type 2                  | Nomenclature for fragment ions         | Yes                               |

## Lipid class PC[M+CH3COO]- / For additional quantification methods

|                            |                          |                               |                  |
|----------------------------|--------------------------|-------------------------------|------------------|
| Quantitative               | Yes                      | Limit of quantification       | Signal threshold |
| Internal lipid standard(s) | PC 15:0-18:1 (d7)        | Normalization to reference    | No               |
| Type of quantification     | Internal standard amount | Lipid Quantification Software | LipidXplorer     |
| Response correction        | No                       | Batch correction              | No               |
| Type I isotope correction  | Yes                      |                               |                  |

## Lipid class PE O-a[M-H]- / Lipid identification

|                                 |                         |                                        |                                   |
|---------------------------------|-------------------------|----------------------------------------|-----------------------------------|
| Lipid class                     | PE O-a                  | MS1 verified by standard               | Yes                               |
| MS Level                        | MS1, MS2                | MS2 verified by standard               | Yes                               |
| Identification level            | Molecular species level | Background check at MS1                | Yes                               |
| Polarity mode                   | Negative                | Background check at MS2                | Yes                               |
| Type of negative (precursor)ion | [M-H]-                  | Check isomer overlap                   | Yes                               |
| How many fragments used for ID  | 2 fragments             | Lipid Identification Software          | LipidXplorer                      |
| Fragment ion 1                  | - FA2 (-H)              | Data manipulation                      | Centroiding, Lock mass correction |
| Fragment ion 2                  | FA2 (+O)                | Nomenclature for intact lipid molecule | Yes                               |
| Isotope correction at MS1       | Type 2                  | Nomenclature for fragment ions         | Yes                               |
| Isotope correction at MS2       | Type 2                  |                                        |                                   |

## Lipid class PE O-a[M-H]- / For additional quantification methods

|                            |                          |                               |                  |
|----------------------------|--------------------------|-------------------------------|------------------|
| Quantitative               | Yes                      | Limit of quantification       | Signal threshold |
| Internal lipid standard(s) | PE O-p18:1/18:1 (d9)     | Normalization to reference    | No               |
| Type of quantification     | Internal standard amount | Lipid Quantification Software | LipidXplorer     |
| Response correction        | No                       | Batch correction              | No               |
| Type I isotope correction  | Yes                      |                               |                  |

## Lipid class PE[M-H]- / Lipid identification

|                                 |                         |                                        |                                   |
|---------------------------------|-------------------------|----------------------------------------|-----------------------------------|
| Lipid class                     | PE                      | MS1 verified by standard               | Yes                               |
| MS Level                        | MS1, MS2                | MS2 verified by standard               | Yes                               |
| Identification level            | Molecular species level | Background check at MS1                | Yes                               |
| Polarity mode                   | Negative                | Background check at MS2                | Yes                               |
| Type of negative (precursor)ion | [M-H]-                  | Check isomer overlap                   | Yes                               |
| How many fragments used for ID  | 2 fragments             | Lipid Identification Software          | LipidXplorer                      |
| Fragment ion 1                  | FA1 (+O)                | Data manipulation                      | Centroiding, Lock mass correction |
| Fragment ion 2                  | FA2 (+O)                | Nomenclature for intact lipid molecule | Yes                               |
| Isotope correction at MS1       | Type 2                  | Nomenclature for fragment ions         | Yes                               |
| Isotope correction at MS2       | Type 2                  |                                        |                                   |

## Lipid class PE[M-H]- / For additional quantification methods

|                            |                          |                               |                  |
|----------------------------|--------------------------|-------------------------------|------------------|
| Quantitative               | Yes                      | Limit of quantification       | Signal threshold |
| Internal lipid standard(s) | PE 15:0-18:1 (d7)        | Normalization to reference    | No               |
| Type of quantification     | Internal standard amount | Lipid Quantification Software | LipidXplorer     |
| Response correction        | No                       | Batch correction              | No               |
| Type I isotope correction  | Yes                      |                               |                  |



## Lipid class PG[M-H]- / Lipid identification

|                                 |                         |                                        |                                   |
|---------------------------------|-------------------------|----------------------------------------|-----------------------------------|
| Lipid class                     | PG                      | MS1 verified by standard               | Yes                               |
| MS Level                        | MS1, MS2                | MS2 verified by standard               | Yes                               |
| Identification level            | Molecular species level | Background check at MS1                | Yes                               |
| Polarity mode                   | Negative                | Background check at MS2                | Yes                               |
| Type of negative (precursor)ion | [M-H]-                  | Check isomer overlap                   | Yes                               |
| How many fragments used for ID  | 2 fragments             | Lipid Identification Software          | LipidXplorer                      |
| Fragment ion 1                  | FA1 (+O)                | Data manipulation                      | Centroiding, Lock mass correction |
| Fragment ion 2                  | FA2 (+O)                | Nomenclature for intact lipid molecule | Yes                               |
| Isotope correction at MS1       | Type 2                  | Nomenclature for fragment ions         | Yes                               |
| Isotope correction at MS2       | Type 2                  |                                        |                                   |

## Lipid class PG[M-H]- / For additional quantification methods

|                            |                          |                               |                  |
|----------------------------|--------------------------|-------------------------------|------------------|
| Quantitative               | Yes                      | Limit of quantification       | Signal threshold |
| Internal lipid standard(s) | PG 15:0-18:1 (d7)        | Normalization to reference    | No               |
| Type of quantification     | Internal standard amount | Lipid Quantification Software | LipidXplorer     |
| Response correction        | No                       | Batch correction              | No               |
| Type I isotope correction  | Yes                      |                               |                  |

## Lipid class PI[M-H]- / Lipid identification

|                                 |                         |                                        |                                   |
|---------------------------------|-------------------------|----------------------------------------|-----------------------------------|
| Lipid class                     | PI                      | Isotope correction at MS2              | Type 2                            |
| MS Level                        | MS1, MS2                | MS1 verified by standard               | Yes                               |
| Identification level            | Molecular species level | MS2 verified by standard               | Yes                               |
| Polarity mode                   | Negative                | Background check at MS1                | Yes                               |
| Type of negative (precursor)ion | [M-H]-                  | Background check at MS2                | Yes                               |
| How many fragments used for ID  | 3 fragments             | Check isomer overlap                   | Yes                               |
| Fragment ion 1                  | FA1 (+O)                | Lipid Identification Software          | LipidXplorer                      |
| Fragment ion 2                  | FA2 (+O)                | Data manipulation                      | Centroiding, Lock mass correction |
| Fragment ion 3                  | PI m/z 241              | Nomenclature for intact lipid molecule | Yes                               |
| Isotope correction at MS1       | Type 2                  | Nomenclature for fragment ions         | Yes                               |

## Lipid class PI[M-H]- / For additional quantification methods

|                            |                          |                               |                  |
|----------------------------|--------------------------|-------------------------------|------------------|
| Quantitative               | Yes                      | Limit of quantification       | Signal threshold |
| Internal lipid standard(s) | PI 15:0-18:1 (d7)        | Normalization to reference    | No               |
| Type of quantification     | Internal standard amount | Lipid Quantification Software | LipidXplorer     |
| Response correction        | No                       | Batch correction              | No               |
| Type I isotope correction  | Yes                      |                               |                  |

## Lipid class PS[M-H]- / Lipid identification

|                                 |                         |                                        |                                   |
|---------------------------------|-------------------------|----------------------------------------|-----------------------------------|
| Lipid class                     | PS                      | Isotope correction at MS2              | Type 2                            |
| MS Level                        | MS1, MS2                | MS1 verified by standard               | Yes                               |
| Identification level            | Molecular species level | MS2 verified by standard               | Yes                               |
| Polarity mode                   | Negative                | Background check at MS1                | Yes                               |
| Type of negative (precursor)ion | [M-H]-                  | Background check at MS2                | Yes                               |
| How many fragments used for ID  | 3 fragments             | Check isomer overlap                   | Yes                               |
| Fragment ion 1                  | FA1 (+O)                | Lipid Identification Software          | LipidXplorer                      |
| Fragment ion 2                  | FA2 (+O)                | Data manipulation                      | Centroiding, Lock mass correction |
| Fragment ion 3                  | PS m/z 87               | Nomenclature for intact lipid molecule | Yes                               |
| Isotope correction at MS1       | Type 2                  | Nomenclature for fragment ions         | Yes                               |

## Lipid class PS[M-H]- / For additional quantification methods

|                            |                          |                               |                  |
|----------------------------|--------------------------|-------------------------------|------------------|
| Quantitative               | Yes                      | Limit of quantification       | Signal threshold |
| Internal lipid standard(s) | PS 15:0-18:1 (d7)        | Normalization to reference    | No               |
| Type of quantification     | Internal standard amount | Lipid Quantification Software | LipidXplorer     |
| Response correction        | No                       | Batch correction              | No               |
| Type I isotope correction  | Yes                      |                               |                  |

## Lipid class TG[M+NH4]+ / Lipid identification

|                                 |               |                                        |                                   |
|---------------------------------|---------------|----------------------------------------|-----------------------------------|
| Lipid class                     | TG            | MS1 verified by standard               | Yes                               |
| MS Level                        | MS1           | Background check at MS1                | Yes                               |
| Identification level            | Species level | Check isomer overlap                   | Yes                               |
| Polarity mode                   | Positive      | Lipid Identification Software          | LipidXplorer                      |
| Type of positive (precursor)ion | [M+NH4]+      | Data manipulation                      | Centroiding, Lock mass correction |
| Isotope correction at MS1       | Type 2        | Nomenclature for intact lipid molecule | Yes                               |

## Lipid class TG[M+NH4]+ / For additional quantification methods

|                            |                          |                               |                  |
|----------------------------|--------------------------|-------------------------------|------------------|
| Quantitative               | Yes                      | Limit of quantification       | Signal threshold |
| Internal lipid standard(s) | TG<br>15:0-18:1(d7)-15:0 | Normalization to reference    | No               |
| Type of quantification     | Internal standard amount | Lipid Quantification Software | LipidXplorer     |
| Response correction        | No                       | Batch correction              | No               |
| Type I isotope correction  | Yes                      |                               |                  |
