# Supplementary material
Source: PubMed Central journal article supplement (PMC7615361)

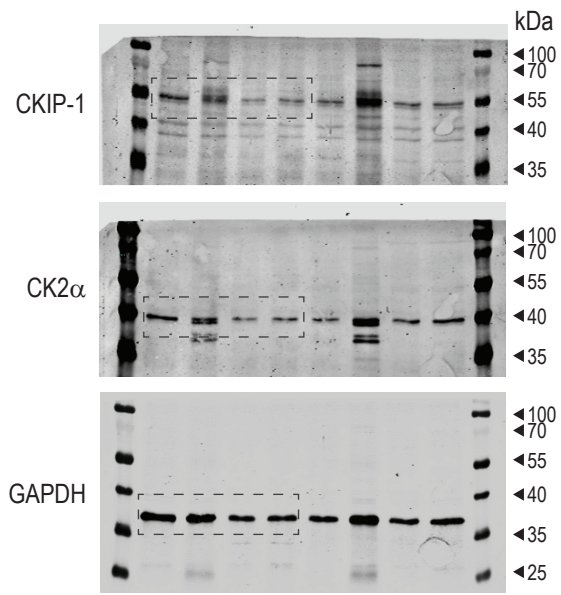

Supplement: EMS191838-supplement-Source_Data_Fig__6.pdf [file EMS191838-supplement-Source_Data_Fig__6.pdf]
